# Supplementary material for: Substituent effects on fluorescence properties of thiazolo[4,5-b]pyrazine derivatives
Source: Royal Society of Chemistry journal article supplement (doi:10.1039/c4pp00298a), 2014-10-10
Supplement: c4pp00298a1.pdf [file c4pp00298a1.pdf]

## Electronic Supplementary Information

### Substituent effects on fluorescence properties of thiazolo[4,5-*b*]pyrazine derivatives

Tatsuki Nakagawa,<sup>a</sup> Minoru Yamaji,<sup>b</sup> Shojiro Maki,<sup>a</sup> Haruki Niwa<sup>a</sup>  
and Takashi Hirano\*.<sup>a</sup>

<sup>a</sup> *Department of Engineering Science, Graduate School of Informatics and Engineering,  
The University of Electro-Communications, Chofu, Tokyo 182-8585, Japan.*

<sup>b</sup> *Division of Molecular Science, Graduate School of Science and Technology,  
Gunma University, Kiryu, Gunma 376-8515, Japan*

\*Tel.: +81-42-443-5489; e-mail: thirano@uec.ac.jp

## 1. Transient absorption measurements of **3b** and **3c** in acetonitrile

Figure S1 shows transient absorption spectra obtained upon 355 nm laser photolysis of **3b** and **3c** in deaerated acetonitrile at 295 K. The lifetimes of the transient signals for **3b** and **3c** were, respectively, 4.8  $\mu\text{s}$  and 2.2  $\mu\text{s}$ , which were shortened on exposing the solution to the air. These observations show that the transient signals are due to triplet manifolds of **3b** and **3c**. The spectral shapes are similar to those obtained in cyclohexane.

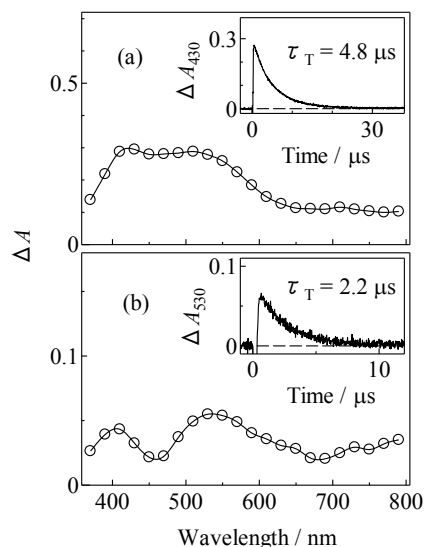

**Figure S1.** Transient absorption spectra at 600 ns upon 355 nm laser pulsing in acetonitrile solutions of **3b** (a) and **3c** (b) at 295 K. Insets; time profiles at 430 nm (a) and 530 nm (b).

## 2. Geometries of TPy derivatives in gas phase optimized with DFT using B3LYP/6-31G(d)

### 2.1 Cartesian coordinates (in $\text{\AA}$ ) of 2-*t*-butylTPy (**2**)

| No | atom | x         | y         | z         |
|----|------|-----------|-----------|-----------|
| 1  | H    | -4.802612 | 1.653111  | -0.847425 |
| 2  | C    | -4.252591 | -0.204774 | 0.119523  |
| 3  | C    | -3.983874 | 1.024038  | -0.504400 |
| 4  | N    | -2.746112 | 1.482876  | -0.708547 |
| 5  | C    | -1.767169 | 0.684115  | -0.275647 |
| 6  | C    | -2.054893 | -0.557606 | 0.352831  |
| 7  | N    | -3.281714 | -1.015491 | 0.559798  |
| 8  | N    | -0.426724 | 0.988383  | -0.397038 |
| 9  | C    | 0.318478  | 0.054475  | 0.103063  |

|    |   |           |           |           |
|----|---|-----------|-----------|-----------|
| 10 | S | -0.555951 | -1.348772 | 0.804483  |
| 11 | H | -5.276138 | -0.540922 | 0.266667  |
| 12 | C | 1.838724  | 0.076442  | 0.048897  |
| 13 | C | 2.456725  | -0.753961 | 1.190166  |
| 14 | C | 2.265037  | -0.519704 | -1.316859 |
| 15 | C | 2.321139  | 1.538242  | 0.146695  |
| 16 | H | 2.156380  | -0.373819 | 2.172703  |
| 17 | H | 2.174381  | -1.811820 | 1.130521  |
| 18 | H | 3.549380  | -0.705112 | 1.128740  |
| 19 | H | 1.843355  | 0.062632  | -2.142209 |
| 20 | H | 3.357845  | -0.503141 | -1.403473 |
| 21 | H | 1.930844  | -1.557995 | -1.422240 |
| 22 | H | 3.412558  | 1.572288  | 0.052040  |
| 23 | H | 1.878033  | 2.150753  | -0.641774 |
| 24 | H | 2.046385  | 1.979161  | 1.111022  |

## 2.2 Cartesian coordinates (in Å) of 2-(4-dimethylaminophenyl)TPy (3a)

| No | atom | x         | y         | z         |
|----|------|-----------|-----------|-----------|
| 1  | H    | -1.374926 | -2.776492 | -1.009406 |
| 2  | H    | 4.903706  | 1.622106  | 1.157973  |
| 3  | H    | 7.311074  | 1.861506  | 1.169293  |
| 4  | H    | 7.677476  | -1.885965 | -0.969434 |
| 5  | H    | 5.240894  | -2.099656 | -0.963866 |
| 6  | C    | -1.125598 | -0.901440 | 0.039801  |
| 7  | C    | -0.665600 | -2.043407 | -0.630329 |
| 8  | N    | 0.630268  | -2.297554 | -0.840341 |
| 9  | C    | 1.474801  | -1.377980 | -0.362646 |
| 10 | C    | 0.989468  | -0.223030 | 0.316234  |
| 11 | N    | -0.291460 | 0.031190  | 0.525495  |
| 12 | N    | 2.839690  | -1.465507 | -0.482375 |
| 13 | C    | 3.434105  | -0.441825 | 0.066501  |
| 14 | C    | 4.879154  | -0.263577 | 0.092744  |
| 15 | C    | 5.503003  | 0.846171  | 0.688223  |
| 16 | C    | 6.881462  | 0.986921  | 0.696452  |
| 17 | C    | 7.717966  | 0.009798  | 0.099971  |
| 18 | C    | 7.085029  | -1.109867 | -0.500130 |
| 19 | C    | 5.707485  | -1.236865 | -0.500478 |
| 20 | S    | 2.342677  | 0.779050  | 0.814197  |
| 21 | H    | -2.189290 | -0.733155 | 0.189260  |
| 22 | N    | 9.088844  | 0.141745  | 0.102516  |
| 23 | C    | 9.921887  | -0.877825 | -0.514637 |
| 24 | H    | 10.970481 | -0.595314 | -0.409914 |
| 25 | H    | 9.785981  | -1.858790 | -0.038616 |
| 26 | H    | 9.705895  | -0.987081 | -1.586432 |
| 27 | C    | 9.709934  | 1.299030  | 0.725443  |
| 28 | H    | 10.793403 | 1.224282  | 0.621373  |
| 29 | H    | 9.388653  | 2.237709  | 0.252962  |
| 30 | H    | 9.476095  | 1.360474  | 1.797518  |

### 2.3 Cartesian coordinates (in Å) of 2-(4-methoxyphenyl)TPy (3b)

| No | atom | x         | y         | z         |
|----|------|-----------|-----------|-----------|
| 1  | H    | 5.952422  | 1.921039  | -0.000549 |
| 2  | H    | -0.906364 | -2.130032 | -0.000312 |
| 3  | H    | -0.676782 | 2.164439  | 0.000438  |
| 4  | C    | 5.428539  | -0.178666 | -0.000594 |
| 5  | C    | 5.142272  | 1.194697  | -0.000483 |
| 6  | N    | 3.898065  | 1.682459  | -0.000296 |
| 7  | C    | 2.927739  | 0.763310  | -0.000220 |
| 8  | C    | 3.236077  | -0.626535 | -0.000344 |
| 9  | N    | 4.466651  | -1.113164 | -0.000524 |
| 10 | N    | 1.588842  | 1.072444  | -0.000076 |
| 11 | C    | 0.852800  | -0.002728 | -0.000083 |
| 12 | C    | -0.609284 | 0.019370  | 0.000063  |
| 13 | C    | -1.386319 | -1.155054 | -0.000075 |
| 14 | C    | -2.769826 | -1.093074 | 0.000081  |
| 15 | C    | -3.421498 | 0.152299  | 0.000380  |
| 16 | C    | -2.661420 | 1.332242  | 0.000505  |
| 17 | C    | -1.272476 | 1.258037  | 0.000349  |
| 18 | S    | 1.749246  | -1.559781 | -0.000140 |
| 19 | H    | 6.456270  | -0.533324 | -0.000747 |
| 20 | C    | -5.501323 | 1.330139  | 0.001149  |
| 21 | H    | -6.556292 | 1.051778  | 0.001426  |
| 22 | H    | -5.281958 | 1.925426  | 0.896603  |
| 23 | H    | -5.282587 | 1.926013  | -0.894070 |
| 24 | O    | -4.778270 | 0.106317  | 0.000489  |
| 25 | H    | -3.140354 | 2.304431  | 0.000697  |
| 26 | H    | -3.374531 | -1.993922 | -0.000035 |

### 2.4 Cartesian coordinates (in Å) of 2-(3,4,5-trimethoxyphenyl)TPy (3c)

| No | atom | x         | y         | z         |
|----|------|-----------|-----------|-----------|
| 1  | H    | 6.051741  | 1.781464  | 0.248658  |
| 2  | H    | -0.879192 | -2.060594 | -0.070812 |
| 3  | H    | -0.507241 | 2.211491  | -0.237392 |
| 4  | C    | 5.467873  | -0.302438 | 0.219183  |
| 5  | C    | 5.222176  | 1.079066  | 0.200441  |
| 6  | N    | 3.995165  | 1.602482  | 0.124819  |
| 7  | C    | 3.000524  | 0.711362  | 0.066671  |
| 8  | C    | 3.267478  | -0.686496 | 0.087008  |
| 9  | N    | 4.481372  | -1.208691 | 0.162267  |
| 10 | N    | 1.673582  | 1.058835  | -0.014537 |
| 11 | C    | 0.907587  | 0.006051  | -0.057706 |
| 12 | C    | -0.553626 | 0.073330  | -0.150241 |
| 13 | C    | -1.344056 | -1.085525 | -0.151233 |
| 14 | C    | -2.734866 | -0.978172 | -0.240112 |
| 15 | C    | -3.341044 | 0.289573  | -0.343886 |
| 16 | C    | -2.537041 | 1.447982  | -0.337620 |
| 17 | C    | -1.149568 | 1.341179  | -0.240691 |
| 18 | S    | 1.756911  | -1.575256 | -0.004108 |

|    |   |           |           |           |
|----|---|-----------|-----------|-----------|
| 19 | H | 6.483114  | -0.686344 | 0.281502  |
| 20 | C | -5.431465 | 0.767762  | 0.651236  |
| 21 | H | -6.481321 | 0.779082  | 0.350288  |
| 22 | H | -5.295083 | 0.045903  | 1.466434  |
| 23 | H | -5.135892 | 1.767632  | 0.986504  |
| 24 | O | -4.693504 | 0.370829  | -0.507905 |
| 25 | C | -2.458928 | 3.828424  | -0.478576 |
| 26 | H | -1.879810 | 3.973232  | 0.442384  |
| 27 | H | -1.778258 | 3.844188  | -1.338955 |
| 28 | H | -3.189475 | 4.632929  | -0.578711 |
| 29 | O | -3.214137 | 2.625153  | -0.437003 |
| 30 | C | -3.046244 | -3.341439 | -0.173416 |
| 31 | H | -2.393811 | -3.546792 | -1.032307 |
| 32 | H | -2.482643 | -3.502609 | 0.755410  |
| 33 | H | -3.899817 | -4.021016 | -0.198860 |
| 34 | O | -3.592781 | -2.033659 | -0.234810 |

### 2.5 Cartesian coordinates (in Å) of 2-phenylTPy (3d)

| No | atom | x         | y         | z         |
|----|------|-----------|-----------|-----------|
| 1  | H    | -1.372746 | -2.779102 | -1.010240 |
| 2  | H    | 4.884872  | 1.623769  | 1.159530  |
| 3  | H    | 7.336605  | 1.851476  | 1.162450  |
| 4  | H    | 7.696424  | -1.873596 | -0.964058 |
| 5  | H    | 5.217995  | -2.102638 | -0.965362 |
| 6  | C    | -1.125065 | -0.901983 | 0.039578  |
| 7  | C    | -0.663986 | -2.045764 | -0.631309 |
| 8  | N    | 0.631007  | -2.297803 | -0.840129 |
| 9  | C    | 1.472608  | -1.376382 | -0.361585 |
| 10 | C    | 0.988536  | -0.222727 | 0.316201  |
| 11 | N    | -0.294114 | 0.030734  | 0.525128  |
| 12 | N    | 2.839585  | -1.461648 | -0.480221 |
| 13 | C    | 3.427605  | -0.438414 | 0.068459  |
| 14 | C    | 4.884689  | -0.262014 | 0.092978  |
| 15 | C    | 5.492487  | 0.853153  | 0.692551  |
| 16 | C    | 6.879408  | 0.983968  | 0.695193  |
| 17 | C    | 7.677171  | 0.004341  | 0.099638  |
| 18 | C    | 7.080059  | -1.108966 | -0.499560 |
| 19 | C    | 5.695403  | -1.244727 | -0.504868 |
| 20 | S    | 2.339924  | 0.779299  | 0.813918  |
| 21 | H    | -2.189079 | -0.735306 | 0.188163  |
| 22 | H    | 8.759181  | 0.107838  | 0.102454  |

### 2.6 Cartesian coordinates (in Å) of 2-(4-cyanophenyl)TPy (3e)

| No | atom | x         | y         | z         |
|----|------|-----------|-----------|-----------|
| 1  | H    | -4.786066 | 1.853685  | 0.000217  |
| 2  | H    | 2.134308  | -2.079561 | 0.000289  |
| 3  | H    | 4.591974  | -1.906371 | 0.000403  |
| 4  | H    | 4.299434  | 2.391057  | -0.000032 |

|    |   |           |           |           |
|----|---|-----------|-----------|-----------|
| 5  | H | 1.814769  | 2.212602  | -0.000128 |
| 6  | C | -4.227739 | -0.239439 | 0.000545  |
| 7  | C | -3.963951 | 1.141339  | 0.000196  |
| 8  | N | -2.729251 | 1.647652  | -0.000166 |
| 9  | C | -1.745451 | 0.742474  | -0.000199 |
| 10 | C | -2.029511 | -0.650561 | 0.000227  |
| 11 | N | -3.253255 | -1.157698 | 0.000551  |
| 12 | N | -0.410416 | 1.071999  | -0.000296 |
| 13 | C | 0.337168  | 0.006990  | 0.000008  |
| 14 | C | 1.805442  | 0.062656  | 0.000088  |
| 15 | C | 2.597638  | -1.097196 | 0.000228  |
| 16 | C | 3.984090  | -1.007854 | 0.000291  |
| 17 | C | 4.604604  | 0.252821  | 0.000198  |
| 18 | C | 3.817525  | 1.418929  | 0.000043  |
| 19 | C | 2.433410  | 1.322340  | -0.000013 |
| 20 | S | -0.529157 | -1.559918 | -0.000336 |
| 21 | H | -5.249905 | -0.609531 | 0.000797  |
| 22 | C | 6.034741  | 0.348923  | 0.000249  |
| 23 | N | 7.195461  | 0.426733  | 0.000290  |

## 2.7 Cartesian coordinates (in Å) of 6-(4-dimethylaminophenyl)-2-phenylTPy (4)

| No | atom | x         | y         | z         |
|----|------|-----------|-----------|-----------|
| 1  | H    | -7.563376 | -1.420708 | -0.426371 |
| 2  | H    | -7.518529 | -1.036563 | 1.309326  |
| 3  | H    | -8.644701 | -0.187357 | 0.230189  |
| 4  | H    | -6.750372 | 2.361578  | 0.945530  |
| 5  | H    | -6.736270 | 2.371341  | -0.832376 |
| 6  | H    | -8.189981 | 1.862708  | 0.033170  |
| 7  | H    | -5.557293 | -2.005001 | 0.286011  |
| 8  | H    | -3.205415 | -2.524024 | 0.240631  |
| 9  | H    | -2.255786 | 1.635639  | -0.253753 |
| 10 | H    | -4.629488 | 2.190603  | -0.207604 |
| 11 | H    | -1.232728 | -2.928447 | -0.353507 |
| 12 | H    | 4.916324  | 2.076393  | 0.186437  |
| 13 | H    | 7.366592  | 2.325186  | 0.216336  |
| 14 | H    | 7.814406  | -1.934986 | -0.201417 |
| 15 | H    | 5.337780  | -2.183772 | -0.230780 |
| 16 | N    | -6.667895 | 0.439387  | 0.024037  |
| 17 | C    | -7.638845 | -0.604949 | 0.303437  |
| 18 | C    | -7.099197 | 1.827162  | 0.048523  |
| 19 | C    | -5.317953 | 0.139687  | 0.018241  |
| 20 | C    | -4.855129 | -1.191653 | 0.148291  |
| 21 | C    | -3.499220 | -1.486306 | 0.115952  |
| 22 | C    | -2.524711 | -0.484422 | -0.039767 |
| 23 | C    | -2.985819 | 0.840609  | -0.147319 |
| 24 | C    | -4.335856 | 1.151361  | -0.119784 |
| 25 | C    | -1.080478 | -0.771019 | -0.079468 |
| 26 | C    | -0.559521 | -2.084071 | -0.234858 |
| 27 | N    | 0.737235  | -2.374697 | -0.266791 |
| 28 | C    | 1.568979  | -1.332113 | -0.151028 |

|    |   |           |           |           |
|----|---|-----------|-----------|-----------|
| 29 | C | 1.053115  | -0.017703 | -0.016831 |
| 30 | N | -0.232484 | 0.276326  | 0.022150  |
| 31 | N | 2.938486  | -1.438471 | -0.161807 |
| 32 | C | 3.505298  | -0.272657 | -0.044774 |
| 33 | C | 4.960230  | -0.078541 | -0.024431 |
| 34 | C | 5.543472  | 1.192912  | 0.101323  |
| 35 | C | 6.929317  | 1.335553  | 0.118235  |
| 36 | C | 7.751698  | 0.212026  | 0.009675  |
| 37 | C | 7.179252  | -1.057514 | -0.116481 |
| 38 | C | 5.796021  | -1.205636 | -0.133826 |
| 39 | H | 8.832328  | 0.324750  | 0.023097  |
| 40 | S | 2.384768  | 1.124363  | 0.095203  |

### 3. TDDFT calculations for excitations to the first three singlet-excited states of TPy derivatives using B3LYP/6-31G(d)

#### 3.1 Excitation of 2-*t*-butylTPy (2)

Excitation energies and oscillator strengths:

|               |    |           |           |           |          |
|---------------|----|-----------|-----------|-----------|----------|
| Excited State | 1: | Singlet-A | 3.8397 eV | 322.90 nm | f=0.0019 |
| 51 -> 52      |    | 0.70266   |           |           |          |
| Excited State | 2: | Singlet-A | 4.6562 eV | 266.28 nm | f=0.0022 |
| 48 -> 52      |    | 0.17949   |           |           |          |
| 51 -> 53      |    | 0.67768   |           |           |          |
| Excited State | 3: | Singlet-A | 4.6930 eV | 264.19 nm | f=0.1455 |
| 49 -> 52      |    | -0.26597  |           |           |          |
| 49 -> 53      |    | -0.16365  |           |           |          |
| 50 -> 52      |    | 0.61321   |           |           |          |
| 50 -> 53      |    | -0.10065  |           |           |          |

#### 3.2 Excitation of 2-(4-dimethylaminophenyl)TPy (3a)

Excitation energies and oscillator strengths:

|               |    |           |           |           |          |
|---------------|----|-----------|-----------|-----------|----------|
| Excited State | 1: | Singlet-A | 3.4086 eV | 363.74 nm | f=0.8154 |
| 67 -> 68      |    | 0.70282   |           |           |          |
| Excited State | 2: | Singlet-A | 3.7311 eV | 332.30 nm | f=0.0013 |
| 66 -> 68      |    | 0.69101   |           |           |          |
| 66 -> 69      |    | -0.12428  |           |           |          |
| Excited State | 3: | Singlet-A | 4.1127 eV | 301.47 nm | f=0.0825 |
| 67 -> 69      |    | 0.69161   |           |           |          |

#### 3.3 Excitation of 2-(4-methoxyphenyl)TPy (3b)

Excitation energies and oscillator strengths:

|               |    |           |           |           |          |
|---------------|----|-----------|-----------|-----------|----------|
| Excited State | 1: | Singlet-A | 3.6978 eV | 335.29 nm | f=0.0012 |
| 62 -> 64      |    | 0.69151   |           |           |          |
| 62 -> 65      |    | -0.12094  |           |           |          |
| Excited State | 2: | Singlet-A | 3.7783 eV | 328.15 nm | f=0.7651 |
| 63 -> 64      |    | 0.69996   |           |           |          |
| Excited State | 3: | Singlet-A | 4.4507 eV | 278.57 nm | f=0.0159 |
| 59 -> 64      |    | 0.13219   |           |           |          |
| 61 -> 64      |    | 0.47981   |           |           |          |
| 63 -> 65      |    | 0.43396   |           |           |          |
| 63 -> 66      |    | 0.19872   |           |           |          |

### 3.4 Excitation of 2-(3,4,5-trimethoxyphenyl)TPy (3c)

Excitation energies and oscillator strengths:

|               |    |           |           |           |          |
|---------------|----|-----------|-----------|-----------|----------|
| Excited State | 1: | Singlet-A | 3.5386 eV | 350.38 nm | f=0.5313 |
| 78 -> 80      |    | 0.13758   |           |           |          |
| 79 -> 80      |    | 0.68874   |           |           |          |
| Excited State | 2: | Singlet-A | 3.6059 eV | 343.84 nm | f=0.0470 |
| 78 -> 80      |    | 0.68185   |           |           |          |
| 79 -> 80      |    | -0.13784  |           |           |          |
| Excited State | 3: | Singlet-A | 3.6810 eV | 336.82 nm | f=0.0013 |
| 77 -> 80      |    | 0.68982   |           |           |          |
| 77 -> 81      |    | -0.12018  |           |           |          |

### 3.5 Excitation of 2-phenylTPy (3d)

Excitation energies and oscillator strengths:

|               |    |           |           |           |          |
|---------------|----|-----------|-----------|-----------|----------|
| Excited State | 1: | Singlet-A | 3.6421 eV | 340.42 nm | f=0.0010 |
| 54 -> 56      |    | 0.69141   |           |           |          |
| 54 -> 57      |    | -0.12031  |           |           |          |
| Excited State | 2: | Singlet-A | 4.0290 eV | 307.73 nm | f=0.6326 |
| 55 -> 56      |    | 0.69275   |           |           |          |
| Excited State | 3: | Singlet-A | 4.3855 eV | 282.71 nm | f=0.0083 |
| 53 -> 56      |    | 0.66830   |           |           |          |
| 55 -> 58      |    | -0.17737  |           |           |          |

### 3.6 Excitation of 2-(4-cyanophenyl)TPy (3e)

Excitation energies and oscillator strengths:

|               |    |           |           |           |          |
|---------------|----|-----------|-----------|-----------|----------|
| Excited State | 1: | Singlet-A | 3.4791 eV | 356.36 nm | f=0.0006 |
| 60 -> 62      |    | 0.68539   |           |           |          |
| 60 -> 63      |    | 0.14783   |           |           |          |
| Excited State | 2: | Singlet-A | 3.8654 eV | 320.75 nm | f=0.8124 |
| 61 -> 62      |    | 0.69433   |           |           |          |
| Excited State | 3: | Singlet-A | 4.3497 eV | 285.04 nm | f=0.0306 |



|          |         |
|----------|---------|
| 58 -> 62 | 0.13908 |
| 59 -> 62 | 0.64726 |
| 61 -> 64 | 0.18615 |

### 3.7 Excitation of 6-(4-dimethylaminophenyl)-2-phenylTPy (4)

Excitation energies and oscillator strengths:

|               |    |           |           |           |          |
|---------------|----|-----------|-----------|-----------|----------|
| Excited State | 1: | Singlet-A | 2.9091 eV | 426.19 nm | f=0.7736 |
| 87 -> 88      |    | 0.70420   |           |           |          |
| Excited State | 2: | Singlet-A | 3.5883 eV | 345.52 nm | f=0.0010 |
| 85 -> 88      |    | 0.69320   |           |           |          |
| 85 -> 89      |    | -0.10692  |           |           |          |
| Excited State | 3: | Singlet-A | 3.7297 eV | 332.43 nm | f=0.0141 |
| 87 -> 89      |    | 0.68986   |           |           |          |
